# Supplementary material for: A longitudinal study of the diabetic skin and wound microbiome
Source: PubMed Central journal article supplement (PMC5522608; doi:10.7717/peerj.3543), 2017-07-20

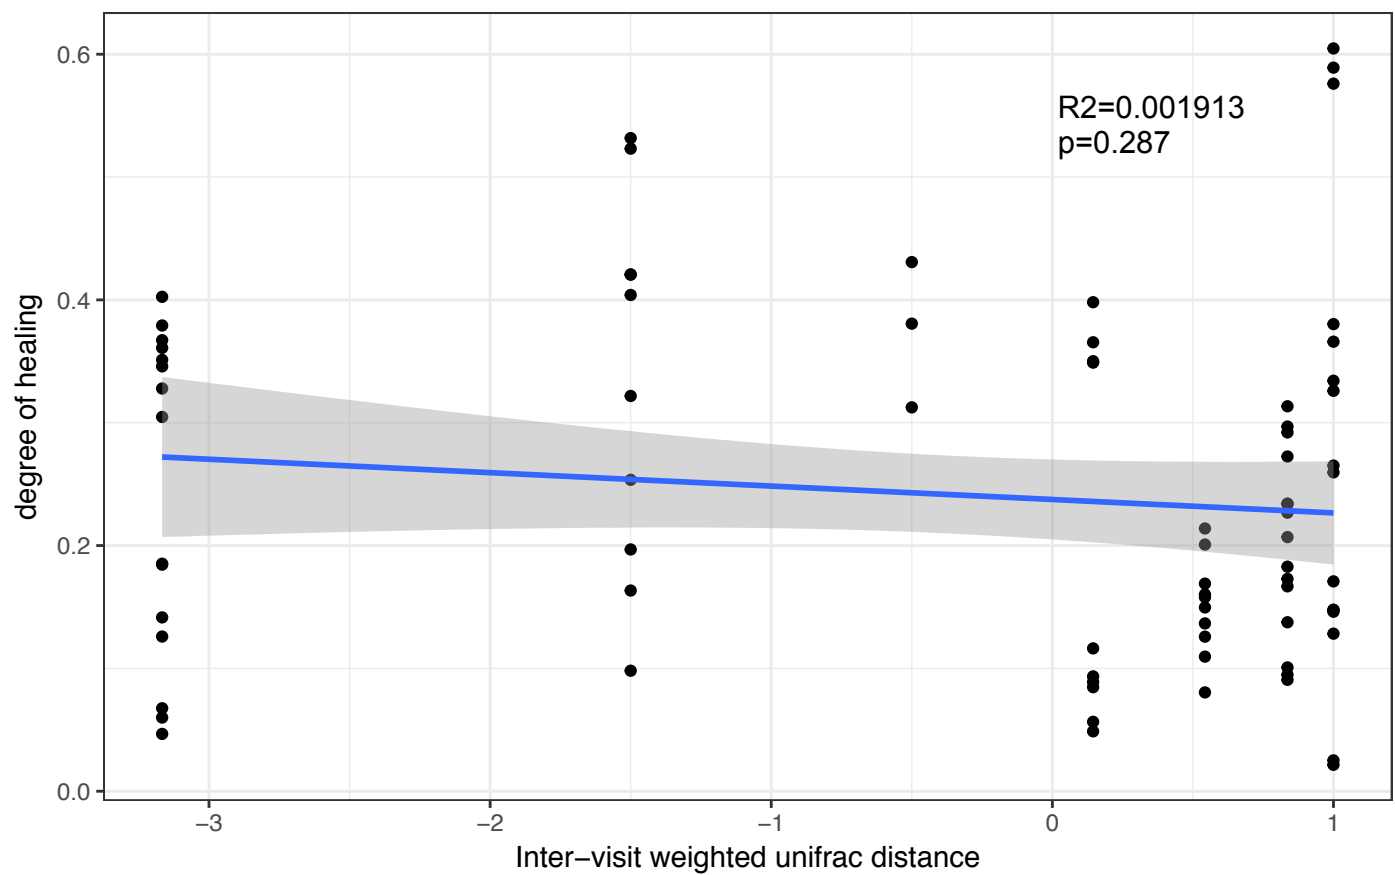

Supplement: peerj-05-3543-s010.pdf [file peerj-05-3543-s010.pdf]
