# Supplementary material for: A longitudinal study of the diabetic skin and wound microbiome
Source: PeerJ. 2017 Jul 20;5:e3543. doi: 10.7717/peerj.3543 (PMC5522608; doi:10.7717/peerj.3543)
Supplement: Table S6 — The Wald test was used as implemented in DESeq2. The model health + subject:health was used, and OTUs were collapsed into genera level classifications. The original OTU table was filtered to remove OTUs with a count of less than 2, and/or present in less than 10% of samples. Log2FC was calculated relative to the control skin samples. [file peerj-05-3543-s006.xlsx]

## Sheet: genus_sig_skin.csv
	baseMean	log2FoldChange	lfcSE	stat	pvalue	padj	av_rel_abund_control	av_rel_abund_diabetes
g__Actinomyces	257.581	5.78278	1.4159	3.37791	0.000730399	0.00924625	0.00350478	0.037306
g__Atopobium	12.0045	18.9363	3.71054	4.83388	1.33898e-06	0.000121847	0.00114035	0.0125745
g__Brachybacterium	118.468	-4.24255	0.963262	-3.36622	0.000762053	0.00924625	0.126947	0.027935
g__Brevibacterium	143.317	-4.37984	0.850589	-3.97352	7.08174e-05	0.00214813	0.030988	0.0207788
g__Curtobacterium	16.1207	3.93972	1.02231	2.87556	0.00403312	0.0349537	0.0367544	0.0189024
g__Dermatophilus	68.3881	-6.4961	1.5373	-3.57517	0.000350004	0.00579098	0.111842	0.00322493
g__Dialister	4.7579	7.27921	1.64492	3.81734	0.0001349	0.00306897	0.00496491	0.00258537
g__Dietzia	131.919	-6.99893	1.10118	-5.44774	5.1014e-08	9.28455e-06	0.154351	0.00842276
g__Haemophilus	20.3822	5.25759	1.56349	2.72312	0.00646678	0.0490398	0.00337093	0.00867596
g__Hymenobacter	19.9409	3.76461	0.987755	2.79888	0.00512797	0.0424223	0.0023541	0.000673635
g__Lactobacillus	29.4262	6.01013	1.12945	4.43591	9.16842e-06	0.000556217	0.00594298	0.00187573
g__Megasphaera	5.25378	10.7546	2.53854	3.84259	0.000121741	0.00306897	0.00318713	0.00210027
g__Methylobacterium	47.8237	4.23631	0.961298	3.36661	0.000760993	0.00924625	0.0132018	0.00513415
g__Neisseria	18.914	8.0698	2.58651	2.73333	0.00626968	0.0490398	0.0207895	0.0202033
g__Parvimonas	1.6403	9.02948	2.48505	3.23111	0.00123311	0.0124739	0.00383041	0.000379404
g__Peptoniphilus	28.8786	4.20693	1.06756	3.00398	0.00266471	0.0255251	0.00320663	0.0115989
g__Rickettsiella	26.2803	5.69956	1.45453	3.23098	0.00123369	0.0124739	0.0266316	0.00910569
g__Rubellimicrobium	62.3177	4.74187	0.930919	4.01954	5.83108e-05	0.00212251	0.0187529	0.00307529
g__Rubrobacter	16.8619	4.58377	0.998882	3.58778	0.0003335	0.00579098	0.0127266	0.00189702
g__Serratia	19.0742	4.68808	1.2773	2.88739	0.00388451	0.0349537	0.00185587	0.00148733
g__Spirosoma	6.26992	7.65975	1.96492	3.38933	0.000700645	0.00924625	0.00141946	0.000243902
g__WAL_1855D	3.42665	9.96819	2.42214	3.70259	0.000213407	0.00431556	0.0217544	0.014878
g__Wautersiella	5.66613	-6.00327	1.52226	-3.28674	0.00101356	0.0115292	0.0112531	0.00159117
g__Wolbachia	7.41549	17.0601	3.88075	4.13841	3.49727e-05	0.00159126	0.0177632	0.00142276
