# Supplementary material for: A longitudinal study of the diabetic skin and wound microbiome
Source: PeerJ. 2017 Jul 20;5:e3543. doi: 10.7717/peerj.3543 (PMC5522608; doi:10.7717/peerj.3543)
Supplement: Table S7 — OTUs important to the classification in the Random Forrest Model calculated using the GINI index. [file peerj-05-3543-s007.xlsx]

## Sheet: predictors.txt
	Domain	Phylum	Class	Order	Family	Genus	Species	names	diabetes	control	MeanDecreaseAccuracy	MeanDecreaseGini
2307137	k__Bacteria	p__Cyanobacteria	c__Chloroplast	o__Streptophyta	f__	g__	s__	X2307137	1.85355	1.31962	1.60028	0.303803
917156	k__Bacteria	p__Firmicutes	c__Bacilli	o__Bacillales	f__Staphylococcaceae	g__Staphylococcus	NA	X917156	1.27607	0.625014	1.04877	0.269884
436998	k__Bacteria	p__Actinobacteria	c__Actinobacteria	o__Actinomycetales	f__Corynebacteriaceae	g__Corynebacterium	s__	X436998	1.78495	1.59231	1.94543	0.215993
573035	k__Bacteria	p__Firmicutes	c__Bacilli	o__Bacillales	f__Alicyclobacillaceae	g__Alicyclobacillus	s__	X573035	-0.94661	1.07018	0.324704	0.202085
1040713	k__Bacteria	p__Actinobacteria	c__Actinobacteria	o__Actinomycetales	f__Corynebacteriaceae	g__Corynebacterium	s__	X1040713	0.992358	1.37647	1.41403	0.179528
187815	k__Bacteria	p__Firmicutes	c__Clostridia	o__Thermoanaerobacterales	f__Carboxydocellaceae	g__Carboxydocella	s__	X187815	1.51859	1.7157	1.66127	0.175593
New.CleanUp.ReferenceOTU5985	k__Bacteria	p__Proteobacteria	c__Alphaproteobacteria	o__Rhodospirillales	f__	g__	s__	New.CleanUp.ReferenceOTU5985	1.72856	1.3995	1.70461	0.165884
205559	k__Bacteria	p__Actinobacteria	c__Actinobacteria	o__Actinomycetales	f__Microbacteriaceae	g__	s__	X205559	1.64148	1.37078	1.71428	0.155641
439908	k__Bacteria	p__Firmicutes	c__Bacilli	o__Bacillales	f__Staphylococcaceae	g__Staphylococcus	s__	X439908	0.187334	1.40181	0.959101	0.144761
1097359	k__Bacteria	p__Proteobacteria	c__Gammaproteobacteria	o__Pseudomonadales	f__Moraxellaceae	g__Acinetobacter	s__	X1097359	-0.31808	0.20002	-0.141457	0.136227
576671	k__Bacteria	p__Proteobacteria	c__Gammaproteobacteria	o__Legionellales	f__Coxiellaceae	g__Rickettsiella	s__	X576671	1.00251	1.41544	1.36866	0.13483
360432	k__Bacteria	p__Proteobacteria	c__Alphaproteobacteria	o__Rhodobacterales	f__Rhodobacteraceae	g__Rubellimicrobium	s__	X360432	0.585707	1.68314	1.34772	0.133028
931593	k__Bacteria	p__Actinobacteria	c__Actinobacteria	o__Actinomycetales	f__Micromonosporaceae	NA	NA	X931593	1.9968	1.66109	1.92645	0.12616
249571	k__Bacteria	p__Actinobacteria	c__Actinobacteria	o__Actinomycetales	f__Micromonosporaceae	NA	NA	X249571	0.877913	0	0.733906	0.12594
New.ReferenceOTU82	k__Bacteria	p__[Thermi]	c__Deinococci	o__Deinococcales	f__Deinococcaceae	g__Deinococcus	s__	New.ReferenceOTU82	0.475679	1.00251	0.985064	0.117938
870223	k__Bacteria	p__Actinobacteria	c__Actinobacteria	o__Actinomycetales	f__Nakamurellaceae	g__	s__	X870223	1.94389	1.236	2.12835	0.117197
1081058	k__Bacteria	p__Firmicutes	c__Bacilli	o__Bacillales	f__Staphylococcaceae	g__Staphylococcus	s__	X1081058	0	0.0743304	0.479297	0.112824
882616	k__Bacteria	p__Proteobacteria	c__Alphaproteobacteria	o__Rhodospirillales	f__Acetobacteraceae	g__	s__	X882616	-1.41886	1.00251	-1.00251	0.110731
1060474	k__Bacteria	p__Actinobacteria	c__Actinobacteria	o__Actinomycetales	f__	g__	s__	X1060474	1.41111	0.20002	1.40875	0.110015
1084906	k__Bacteria	p__Firmicutes	c__Bacilli	o__Bacillales	f__Staphylococcaceae	g__Staphylococcus	s__	X1084906	1.41886	0.128042	1.1398	0.108208
New.ReferenceOTU64	k__Bacteria	p__[Thermi]	c__Deinococci	o__Deinococcales	f__Deinococcaceae	g__Deinococcus	s__	New.ReferenceOTU64	1.25003	1.19739	1.6087	0.106039
1050608	k__Bacteria	p__Actinobacteria	c__Actinobacteria	o__Actinomycetales	f__Corynebacteriaceae	g__Corynebacterium	s__	X1050608	1.00251	1.73302	1.52014	0.105193
818603	k__Bacteria	p__Firmicutes	c__Bacilli	o__Bacillales	f__Bacillaceae	g__	s__	X818603	1.38858	0.245807	1.00251	0.104862
567336	k__Bacteria	p__Proteobacteria	c__Alphaproteobacteria	o__Rhizobiales	f__	g__	s__	X567336	1.00251	0	1.00251	0.104778
369953	k__Bacteria	p__Proteobacteria	c__Alphaproteobacteria	o__Rhodospirillales	f__Acetobacteraceae	g__	s__	X369953	1.00251	0	0.633089	0.0995348
189438	k__Bacteria	p__Proteobacteria	c__Gammaproteobacteria	o__Pseudomonadales	f__Pseudomonadaceae	g__Pseudomonas	s__	X189438	1.3682	1.00251	1.27	0.0979497
944435	k__Bacteria	p__Proteobacteria	c__Deltaproteobacteria	o__Myxococcales	f__Haliangiaceae	g__	s__	X944435	-1.00251	0	-1.00251	0.0969663
1033679	k__Bacteria	p__Firmicutes	c__Clostridia	o__Clostridiales	f__[Tissierellaceae]	g__Anaerococcus	s__	X1033679	1.42134	1.00251	1.37541	0.0963468
538315	k__Bacteria	p__Actinobacteria	c__Actinobacteria	o__Actinomycetales	f__Pseudonocardiaceae	g__Pseudonocardia	s__	X538315	1.00251	0.508001	0.748748	0.093928
568461	k__Bacteria	p__Actinobacteria	c__Thermoleophilia	o__Gaiellales	f__Gaiellaceae	g__	s__	X568461	1.41935	-1.70005	-1.00251	0.0929861
1084865	k__Bacteria	p__Firmicutes	c__Bacilli	o__Bacillales	f__Staphylococcaceae	g__Staphylococcus	s__	X1084865	-0.140726	1.00251	1.00251	0.0926674
617833	k__Bacteria	p__Firmicutes	c__Bacilli	o__Bacillales	f__Staphylococcaceae	g__Staphylococcus	NA	X617833	-0.413847	-0.603686	-0.331923	0.0913452
531374	k__Bacteria	p__Firmicutes	c__Clostridia	o__Clostridiales	f__Peptostreptococcaceae	g__	s__	X531374	1.41816	1.00251	1.24303	0.0901745
347704	k__Bacteria	p__Firmicutes	c__Bacilli	o__Bacillales	f__Staphylococcaceae	g__Staphylococcus	s__	X347704	1.00251	1.00251	1.42075	0.0889858
532419	k__Bacteria	p__Actinobacteria	c__Actinobacteria	o__Actinomycetales	f__Dermatophilaceae	g__Dermatophilus	s__	X532419	0.360024	0.589604	0.565445	0.0884358
175203	k__Bacteria	p__Bacteroidetes	c__Cytophagia	o__Cytophagales	f__Cytophagaceae	g__Adhaeribacter	s__	X175203	1.31332	1.00251	1.41711	0.0872171
176591	k__Bacteria	p__Actinobacteria	c__Actinobacteria	o__Actinomycetales	f__Dermacoccaceae	g__Dermacoccus	s__	X176591	1.37849	0.791314	1.71992	0.0865703
1083037	k__Bacteria	p__Proteobacteria	c__Gammaproteobacteria	o__Pseudomonadales	f__Moraxellaceae	g__Moraxella	s__	X1083037	0	0	0.0487373	0.084499
3541	k__Bacteria	p__Cyanobacteria	c__Chloroplast	o__Streptophyta	f__	g__	s__	X3541	0	1.00251	1.00251	0.0838977
369436	k__Bacteria	p__Proteobacteria	c__Alphaproteobacteria	o__Rhodospirillales	f__Acetobacteraceae	g__	s__	X369436	1.00251	1.42134	1.22851	0.083087
1099674	k__Bacteria	p__Firmicutes	c__Bacilli	o__Bacillales	f__Staphylococcaceae	g__Staphylococcus	s__	X1099674	-1.00251	0.372233	-0.40943	0.0824281
543684	k__Bacteria	p__Actinobacteria	c__Actinobacteria	o__Actinomycetales	f__Kineosporiaceae	g__Kineococcus	s__	X543684	1.30539	1.41025	1.36185	0.0814371
1636835	k__Bacteria	p__Actinobacteria	c__Actinobacteria	o__Actinomycetales	f__Corynebacteriaceae	g__Corynebacterium	s__	X1636835	1.42134	1.67954	1.56535	0.0804212
925494	k__Bacteria	p__Firmicutes	c__Bacilli	o__Bacillales	f__Staphylococcaceae	g__Staphylococcus	s__epidermidis	X925494	0.686803	1.00251	0.852796	0.078738
1078587	k__Bacteria	p__Firmicutes	c__Clostridia	o__Clostridiales	f__Lachnospiraceae	g__Blautia	s__	X1078587	0	-1.00251	-1.00251	0.077991
503387	k__Bacteria	p__Firmicutes	c__Clostridia	o__Clostridiales	f__[Tissierellaceae]	g__Anaerococcus	s__	X503387	1.32574	1.41711	1.48859	0.077905
151174	k__Bacteria	p__Bacteroidetes	c__[Saprospirae]	o__[Saprospirales]	f__Chitinophagaceae	g__Flavisolibacter	s__	X151174	1.00251	1.00251	1.41769	0.0775758
815859	k__Bacteria	p__Acidobacteria	c__Acidobacteria-6	o__iii1-15	f__mb2424	g__	s__	X815859	-0.605961	0	-0.585707	0.0772581
1029165	k__Bacteria	p__Firmicutes	c__Clostridia	o__Clostridiales	f__[Tissierellaceae]	g__Anaerococcus	s__	X1029165	1.34772	1.36613	1.42019	0.0771798
173333	k__Bacteria	p__Firmicutes	c__Bacilli	o__Bacillales	f__Staphylococcaceae	g__Staphylococcus	s__epidermidis	X173333	0.501873	1.73622	1.43288	0.0762016
711526	k__Bacteria	p__Actinobacteria	c__Actinobacteria	o__Actinomycetales	f__Micrococcaceae	g__	s__	X711526	1.31876	1.00251	1.3329	0.0761175
781371	k__Bacteria	p__Actinobacteria	c__Actinobacteria	o__Actinomycetales	f__Dietziaceae	NA	NA	X781371	1.72856	0.31808	1.73676	0.0759057
1084157	k__Bacteria	p__Actinobacteria	c__Actinobacteria	o__Actinomycetales	f__Intrasporangiaceae	NA	NA	X1084157	0	1.00251	1.00251	0.0753367
1021335	k__Bacteria	p__Actinobacteria	c__Actinobacteria	o__Actinomycetales	f__Kineosporiaceae	g__	s__	X1021335	0.728572	1.31332	1.00251	0.0750299
11428	k__Bacteria	p__Actinobacteria	c__Actinobacteria	o__Actinomycetales	f__Geodermatophilaceae	g__Geodermatophilus	s__obscurus	X11428	1.21108	0	1.17427	0.0745439
505587	k__Bacteria	p__Firmicutes	c__Clostridia	o__Clostridiales	f__[Tissierellaceae]	g__Finegoldia	s__	X505587	1.37409	-1.41935	0.335904	0.074329
1081815	k__Bacteria	p__Actinobacteria	c__Actinobacteria	o__Actinomycetales	f__Micrococcaceae	g__	s__	X1081815	1.41816	-1.00251	1.00251	0.07413
New.ReferenceOTU182	k__Bacteria	p__Proteobacteria	c__Alphaproteobacteria	o__Rhodobacterales	f__Rhodobacteraceae	g__	s__	New.ReferenceOTU182	0	-1.00251	-1.00251	0.0725806
137056	k__Bacteria	p__Firmicutes	c__Bacilli	o__Bacillales	f__Staphylococcaceae	g__Staphylococcus	s__	X137056	1.00251	-1.41711	-1.00251	0.0703803
420127	k__Bacteria	p__Actinobacteria	c__Actinobacteria	o__Actinomycetales	f__Corynebacteriaceae	g__Corynebacterium	s__	X420127	0.0743304	-0.232527	0	0.0692249
495084	k__Bacteria	p__Firmicutes	c__Clostridia	o__Clostridiales	f__[Tissierellaceae]	g__Anaerococcus	s__	X495084	-1.40691	0.447437	-1.00251	0.0688974
576231	k__Bacteria	p__Actinobacteria	c__Actinobacteria	o__Actinomycetales	f__Kineosporiaceae	g__	s__	X576231	0	0	0	0.0685948
1814180	k__Bacteria	p__Firmicutes	c__Bacilli	o__Bacillales	f__Staphylococcaceae	g__Staphylococcus	s__	X1814180	0.650409	0	0.366586	0.0671801
1052930	k__Bacteria	p__Proteobacteria	c__Gammaproteobacteria	o__Xanthomonadales	f__Xanthomonadaceae	g__Luteimonas	s__	X1052930	1.22351	1.00251	1.40762	0.0648718
764838	k__Bacteria	p__Proteobacteria	c__Alphaproteobacteria	o__Rhizobiales	f__Beijerinckiaceae	g__	s__	X764838	1.00251	-1.00251	0	0.0641958
1002005	k__Bacteria	p__Actinobacteria	c__Actinobacteria	o__Actinomycetales	f__Micrococcaceae	g__Kocuria	s__palustris	X1002005	-0.20002	-0.20002	-0.20002	0.0633949
New.ReferenceOTU12	k__Bacteria	p__Proteobacteria	c__Alphaproteobacteria	o__Rhodospirillales	f__Acetobacteraceae	g__	s__	New.ReferenceOTU12	0	0	0	0.0624887
641818	k__Bacteria	p__Acidobacteria	c__Acidobacteriia	o__Acidobacteriales	f__Acidobacteriaceae	g__	s__	X641818	-1.00251	-1.00251	-1.00251	0.0620513
981783	k__Bacteria	p__Firmicutes	c__Bacilli	o__Bacillales	f__Staphylococcaceae	g__Staphylococcus	NA	X981783	0.614086	1.34772	1.23128	0.0608385
4444134	k__Bacteria	p__Proteobacteria	c__Gammaproteobacteria	o__Xanthomonadales	f__Xanthomonadaceae	g__	s__	X4444134	1.00251	0	0.406539	0.0601346
552026	k__Bacteria	p__Actinobacteria	c__Actinobacteria	o__Actinomycetales	f__Corynebacteriaceae	g__Corynebacterium	s__	X552026	0	1.00251	1.00251	0.0601117
952388	k__Bacteria	p__Proteobacteria	c__Alphaproteobacteria	o__Rhodobacterales	f__Rhodobacteraceae	g__Rubellimicrobium	s__	X952388	1.34772	1.00251	1.22851	0.0596838
1075891	k__Bacteria	p__Firmicutes	c__Bacilli	o__Bacillales	f__Planococcaceae	g__	s__	X1075891	-1.00251	0	-1.00251	0.0593639
1062748	k__Bacteria	p__Actinobacteria	c__Actinobacteria	o__Actinomycetales	f__Mycobacteriaceae	g__Mycobacterium	s__	X1062748	-1.00251	-1.00251	-1.41769	0.0593299
1051459	k__Bacteria	p__Proteobacteria	c__Betaproteobacteria	o__Burkholderiales	f__Comamonadaceae	g__	s__	X1051459	1.00251	-1.00251	0	0.0593029
35330	k__Bacteria	p__Cyanobacteria	c__Chloroplast	o__Streptophyta	f__	g__	s__	X35330	1.41816	1.00251	1.24479	0.0579558
1037355	k__Bacteria	p__Actinobacteria	c__Actinobacteria	o__Actinomycetales	f__Streptomycetaceae	g__Streptomyces	s__	X1037355	-1.00251	1.29282	1.42035	0.0578266
4130483	k__Bacteria	p__Firmicutes	c__Bacilli	o__Bacillales	f__Staphylococcaceae	g__Staphylococcus	NA	X4130483	-1.00251	0	-1.00251	0.0576942
New.CleanUp.ReferenceOTU3015	k__Bacteria	p__Actinobacteria	c__Actinobacteria	o__Actinomycetales	f__	g__	s__	New.CleanUp.ReferenceOTU3015	-0.245807	0	-0.175425	0.0575506
824826	k__Bacteria	p__Proteobacteria	c__Alphaproteobacteria	o__Rhizobiales	f__Hyphomicrobiaceae	g__Rhodoplanes	s__	X824826	0	0	0	0.0574359
1000986	k__Bacteria	p__Actinobacteria	c__Actinobacteria	o__Actinomycetales	f__Corynebacteriaceae	g__Corynebacterium	s__	X1000986	-1.00251	1.00251	0	0.0568293
3621664	k__Bacteria	p__Proteobacteria	c__Alphaproteobacteria	o__Sphingomonadales	f__Sphingomonadaceae	g__Sphingomonas	s__	X3621664	-0.770608	-0.374766	-0.485661	0.0564419
New.ReferenceOTU181	k__Bacteria	p__Cyanobacteria	c__Chloroplast	o__Streptophyta	f__	g__	s__	New.ReferenceOTU181	1.00251	0.447437	0.60388	0.0555948
1111294	k__Bacteria	p__Proteobacteria	c__Gammaproteobacteria	o__Enterobacteriales	f__Enterobacteriaceae	g__	s__	X1111294	0	1.00251	1.00251	0.0555117
1111582	k__Bacteria	p__Firmicutes	c__Bacilli	o__Lactobacillales	f__Enterococcaceae	g__Enterococcus	s__	X1111582	-1.39347	0.700114	-0.0487373	0.0553333
146094	k__Bacteria	p__Bacteroidetes	c__Bacteroidia	o__Bacteroidales	f__Prevotellaceae	g__Prevotella	s__	X146094	0	0	0	0.0551923
153158	k__Bacteria	p__Actinobacteria	c__Actinobacteria	o__Actinomycetales	f__Pseudonocardiaceae	g__Pseudonocardia	s__	X153158	1.00251	0.0940742	0.2174	0.0547758
1646183	k__Bacteria	p__Actinobacteria	c__Coriobacteriia	o__Coriobacteriales	f__Coriobacteriaceae	g__	s__	X1646183	1.00251	1.00251	1.00251	0.0545278
530833	k__Bacteria	p__Actinobacteria	c__Actinobacteria	o__Actinomycetales	f__Micrococcaceae	g__Microbispora	s__rosea	X530833	1.00251	0	1.00251	0.0544238
876519	k__Bacteria	p__Proteobacteria	c__Alphaproteobacteria	o__Rhizobiales	f__Hyphomicrobiaceae	g__	s__	X876519	1.00251	1.00251	1.00251	0.0542564
949062	k__Bacteria	p__Proteobacteria	c__Alphaproteobacteria	o__Sphingomonadales	f__Sphingomonadaceae	g__Kaistobacter	s__	X949062	0	-1.27941	-1.32272	0.0542147
363794	k__Bacteria	p__Actinobacteria	c__Coriobacteriia	o__Coriobacteriales	f__Coriobacteriaceae	g__Collinsella	s__aerofaciens	X363794	0	0.175425	0.0565238	0.0541935
4323284	k__Bacteria	p__Firmicutes	c__Bacilli	o__Bacillales	f__Staphylococcaceae	g__Staphylococcus	s__	X4323284	0.108468	1.00251	0.585707	0.054166
879040	k__Bacteria	p__Proteobacteria	c__Alphaproteobacteria	o__Sphingomonadales	f__Sphingomonadaceae	g__Kaistobacter	s__	X879040	0	0	0	0.0539438
688714	k__Bacteria	p__Proteobacteria	c__Alphaproteobacteria	o__Rhodobacterales	f__Rhodobacteraceae	g__Rubellimicrobium	s__	X688714	1.00251	0.20002	0.745411	0.0533088
4297391	k__Bacteria	p__Actinobacteria	c__Actinobacteria	o__Actinomycetales	f__Intrasporangiaceae	NA	NA	X4297391	1.41935	-1.00251	1.00251	0.0532993
561245	k__Bacteria	p__Proteobacteria	c__Alphaproteobacteria	o__Sphingomonadales	f__Sphingomonadaceae	g__	s__	X561245	1.00251	0	1.00251	0.0530117
254895	k__Bacteria	p__Gemmatimonadetes	c__Gemm-3	o__	f__	g__	s__	X254895	1.00251	0	1.00251	0.0526663
1106471	k__Bacteria	p__Actinobacteria	c__Actinobacteria	o__Actinomycetales	f__Nocardioidaceae	g__	s__	X1106471	1.00251	1.00251	1.00251	0.052612
446403	k__Bacteria	p__Actinobacteria	c__Actinobacteria	o__Actinomycetales	f__Corynebacteriaceae	g__Corynebacterium	s__kroppenstedtii	X446403	0	0	0	0.0525
996116	k__Bacteria	p__Actinobacteria	c__Actinobacteria	o__Actinomycetales	f__Nocardioidaceae	g__	s__	X996116	-1.00251	0	-1.00251	0.0523105
562912	k__Bacteria	p__Actinobacteria	c__Actinobacteria	o__Actinomycetales	f__Promicromonosporaceae	g__Xylanimicrobium	s__	X562912	-1.00251	0	-1.00251	0.0518359
170202	k__Bacteria	p__[Thermi]	c__Deinococci	o__Deinococcales	f__Deinococcaceae	g__Deinococcus	s__	X170202	0	1.00251	1.00251	0.0512821
788268	k__Bacteria	p__Actinobacteria	c__Actinobacteria	o__Actinomycetales	f__Cellulomonadaceae	g__Cellulomonas	s__xylanilytica	X788268	0.605961	1.00251	0.749016	0.0505385
1088647	k__Bacteria	p__Bacteroidetes	c__Flavobacteriia	o__Flavobacteriales	f__[Weeksellaceae]	g__Chryseobacterium	s__	X1088647	1.00251	1.41544	1.34772	0.0505383
503197	k__Bacteria	p__Firmicutes	c__Clostridia	o__Clostridiales	f__[Tissierellaceae]	g__Anaerococcus	s__	X503197	1.00251	-1.00251	-0.0565238	0.0501802
