# Supplementary material for: A longitudinal study of the diabetic skin and wound microbiome
Source: PeerJ. 2017 Jul 20;5:e3543. doi: 10.7717/peerj.3543 (PMC5522608; doi:10.7717/peerj.3543)
Supplement: Table S8 — The Wald test was used as implemented in DESeq2. The model sampletype + sampletype:health was used, and the OTU table was filtered to remove OTUs present in less than 20% of samples. Log2FC was calculated relative to the diabetic skin samples. [file peerj-05-3543-s008.xlsx]

## Sheet: sig_diff_otus_wounds.txt
	Domain	Phylum	Class	Order	Family	Genus	Species	baseMean	log2FoldChange	lfcSE	stat	pvalue	padj	diab_skin_sig_otus_means	diab_skin_sig_otus_sd	wound_sig_otus_means	wound_sig_otus_sd
922761	k__Bacteria	p__Proteobacteria	c__Gammaproteobacteria	o__Enterobacteriales	f__Enterobacteriaceae	g__	s__	30369.9	4.59887	0.820364	4.38691	1.1497e-05	0.000427687	4.5289	16.7358	6.98966	20.8452
932696	k__Bacteria	p__Proteobacteria	c__Gammaproteobacteria	o__Enterobacteriales	f__Enterobacteriaceae	g__Serratia	s__marcescens	4351.55	-6.89434	1.00873	-5.84334	5.11659e-09	9.51686e-07	2.32344	10.1593	3.68066	12.7034
505587	k__Bacteria	p__Firmicutes	c__Clostridia	o__Clostridiales	f__[Tissierellaceae]	g__Finegoldia	s__	6116.13	-3.35706	0.815647	-2.8898	0.00385484	0.0341429	2.27767	5.81617	3.36899	7.11462
667570	k__Bacteria	p__Proteobacteria	c__Gammaproteobacteria	o__Enterobacteriales	f__Enterobacteriaceae	g__	s__	1499.73	-4.13398	0.781538	-4.01002	6.07145e-05	0.00141161	0.839647	3.55352	1.31712	4.44241
988314	k__Bacteria	p__Proteobacteria	c__Gammaproteobacteria	o__Pseudomonadales	f__Moraxellaceae	g__Acinetobacter	s__	1455.67	-4.14168	0.811061	-3.87354	0.000107267	0.00198382	1.42276	4.66316	1.00178	4.40826
217734	k__Bacteria	p__Firmicutes	c__Bacilli	o__Lactobacillales	f__Streptococcaceae	g__Streptococcus	s__anginosus	835.202	-6.67133	1.20757	-4.69649	2.64667e-06	0.00012307	0.545443	2.73027	0.865231	3.42621
1099914	k__Bacteria	p__Firmicutes	c__Clostridia	o__Clostridiales	f__[Tissierellaceae]	g__Peptoniphilus	s__	694.771	-5.66826	0.991144	-4.70997	2.47757e-06	0.00012307	0.586321	2.37851	0.844696	2.98112
109591	k__Bacteria	p__Actinobacteria	c__Actinobacteria	o__Actinomycetales	f__Dermabacteraceae	g__Dermabacter	s__	435.449	-5.81895	0.962563	-5.00638	5.54638e-07	5.15814e-05	0.30059	1.15071	0.469544	1.4338
984831	k__Bacteria	p__Actinobacteria	c__Actinobacteria	o__Actinomycetales	f__Corynebacteriaceae	g__Corynebacterium	s__	700.037	-3.26431	0.617989	-3.66399	0.000248313	0.00362526	1.35164	2.57079	0.416512	0.824586
582466	k__Bacteria	p__Actinobacteria	c__Actinobacteria	o__Actinomycetales	f__Actinomycetaceae	g__Actinobaculum	s__	118.265	-4.54542	1.33514	-2.65547	0.00791978	0.0434676	0.263988	1.39691	0.400359	1.75647
1108960	k__Bacteria	p__Proteobacteria	c__Alphaproteobacteria	o__Sphingomonadales	f__Sphingomonadaceae	g__Sphingomonas	s__	118.792	-5.97471	1.21008	-4.11105	3.9387e-05	0.001221	0.1535	0.557011	0.15571	0.658097
1097359	k__Bacteria	p__Proteobacteria	c__Gammaproteobacteria	o__Pseudomonadales	f__Moraxellaceae	g__Acinetobacter	s__	818.76	-3.59635	0.841387	-3.0858	0.00203003	0.0222109	0.770969	2.59945	0.116977	0.337984
813945	k__Bacteria	p__Proteobacteria	c__Gammaproteobacteria	o__Pseudomonadales	f__Pseudomonadaceae	g__	s__	189.44	-4.55564	0.971801	-3.65882	0.000253379	0.00362526	0.189471	1.05697	0.0826143	0.409792
574655	k__Bacteria	p__Proteobacteria	c__Alphaproteobacteria	o__Rhizobiales	f__Methylobacteriaceae	g__Methylobacterium	s__	74.0317	-3.31435	0.834029	-2.77491	0.00552175	0.0366802	0.073223	0.249566	0.078042	0.307322
990864	k__Bacteria	p__Proteobacteria	c__Gammaproteobacteria	o__Pseudomonadales	f__Moraxellaceae	g__Enhydrobacter	s__	442.079	-4.81232	0.963868	-3.95523	7.64614e-05	0.0015802	0.655756	3.28804	0.0617143	0.224728
503387	k__Bacteria	p__Firmicutes	c__Clostridia	o__Clostridiales	f__[Tissierellaceae]	g__Anaerococcus	s__	41.5093	-4.77748	0.939683	-4.01995	5.821e-05	0.00141161	0.0743084	0.170934	0.0537052	0.170395
1011954	k__Bacteria	p__Actinobacteria	c__Actinobacteria	o__Actinomycetales	f__Corynebacteriaceae	g__Corynebacterium	s__	71.5791	-3.78666	0.926801	-3.00675	0.0026406	0.0272862	0.153212	0.450724	0.0532677	0.205794
1104936	k__Bacteria	p__Proteobacteria	c__Gammaproteobacteria	o__Enterobacteriales	f__Enterobacteriaceae	g__	s__	201.869	5.01763	1.16258	3.45578	0.000548697	0.00680384	0.0314708	0.118717	0.0491169	0.147861
441265	k__Bacteria	p__Actinobacteria	c__Actinobacteria	o__Actinomycetales	f__Corynebacteriaceae	g__Corynebacterium	s__	44.4972	-5.404	1.14341	-3.85165	0.000117323	0.00198382	0.0854185	0.362708	0.0488073	0.185227
865469	k__Bacteria	p__Proteobacteria	c__Gammaproteobacteria	o__Pasteurellales	f__Pasteurellaceae	g__Haemophilus	NA	37.7564	-4.65389	1.07435	-3.40102	0.00067136	0.00780456	0.0652896	0.317961	0.0339548	0.111235
425721	k__Bacteria	p__Proteobacteria	c__Gammaproteobacteria	o__Enterobacteriales	f__Enterobacteriaceae	g__	s__	117.27	4.44384	1.23572	2.7869	0.00532144	0.0366588	0.0175543	0.0675751	0.0271021	0.0842513
585419	k__Bacteria	p__Firmicutes	c__Clostridia	o__Clostridiales	f__Veillonellaceae	g__Veillonella	s__parvula	117.497	-4.06268	1.05488	-2.90335	0.00369199	0.0341429	0.107965	0.675817	0.0243476	0.0852348
992510	k__Bacteria	p__Proteobacteria	c__Alphaproteobacteria	o__Sphingomonadales	f__Sphingomonadaceae	g__Sphingomonas	s__	46.4859	-5.01742	1.16127	-3.4595	0.000541188	0.00680384	0.0419795	0.142044	0.0242769	0.136879
310003	k__Bacteria	p__Proteobacteria	c__Alphaproteobacteria	o__Caulobacterales	f__Caulobacteraceae	g__	s__	193.786	-3.86972	1.08003	-2.65706	0.00788246	0.0434676	0.103112	0.389325	0.0175364	0.0755254
4394926	k__Bacteria	p__Proteobacteria	c__Gammaproteobacteria	o__Enterobacteriales	f__Enterobacteriaceae	g__	s__	80.3029	4.49034	1.31494	2.65437	0.00794568	0.0434676	0.0110314	0.0444705	0.0174876	0.0554495
666757	k__Bacteria	p__Proteobacteria	c__Gammaproteobacteria	o__Enterobacteriales	f__Enterobacteriaceae	g__	s__	54.6019	4.37734	1.23229	2.74071	0.00613064	0.0380099	0.00920966	0.0364618	0.014458	0.0454607
4376230	k__Bacteria	p__Proteobacteria	c__Gammaproteobacteria	o__Enterobacteriales	f__Enterobacteriaceae	NA	NA	67.0387	4.44875	1.28044	2.69341	0.0070725	0.042435	0.00926842	0.0356969	0.0143199	0.0445047
228556	k__Bacteria	p__Proteobacteria	c__Gammaproteobacteria	o__Enterobacteriales	f__Enterobacteriaceae	g__	s__	58.0573	4.42643	1.20057	2.85401	0.00431718	0.0361709	0.00851842	0.0324503	0.013071	0.0404915
540402	k__Bacteria	p__Proteobacteria	c__Gammaproteobacteria	o__Enterobacteriales	f__Enterobacteriaceae	g__	s__	52.218	4.56664	1.26339	2.82307	0.00475664	0.0361709	0.00800103	0.0314463	0.012201	0.0392006
153978	k__Bacteria	p__Cyanobacteria	c__Chloroplast	o__Streptophyta	f__	g__	s__	19.89	-4.28867	1.16266	-2.82858	0.00467548	0.0361709	0.0189428	0.0468408	0.0115643	0.0433831
New.ReferenceOTU139	k__Bacteria	p__Firmicutes	c__Bacilli	o__Bacillales	f__Staphylococcaceae	g__Jeotgalicoccus	s__	32.58	-4.33468	1.21628	-2.7417	0.00611228	0.0380099	0.047704	0.194956	0.0102725	0.056978
940737	k__Bacteria	p__Proteobacteria	c__Betaproteobacteria	o__Burkholderiales	f__Comamonadaceae	g__	s__	20.9546	-4.69784	1.31904	-2.80343	0.00505614	0.0361709	0.0151938	0.0561852	0.00952928	0.0611485
1088305	k__Bacteria	p__Actinobacteria	c__Actinobacteria	o__Actinomycetales	f__Corynebacteriaceae	g__Corynebacterium	s__	112.617	-4.15147	1.06074	-2.971	0.00296833	0.0290584	0.12721	0.583768	0.00731348	0.0169431
128390	k__Bacteria	p__Actinobacteria	c__Actinobacteria	o__Actinomycetales	f__Corynebacteriaceae	g__Corynebacterium	s__	26.2189	-4.61649	1.28605	-2.81209	0.00492201	0.0361709	0.0446137	0.225482	0.005649	0.0181503
